# Supplementary material for: 2, 3, 5, 4’-tetrahydroxystilbene-2-O-beta-D-glucoside protects against neuronal cell death and traumatic brain injury-induced pathophysiology
Source: publisher site journal article supplement (doi:10.18632/aging.203958), 2022-03-21
Supplement: Supplementary file [file aging-v14i6-203958-supplementary-material-SD1.pdf]

SUPPLEMENTARY FIGURE

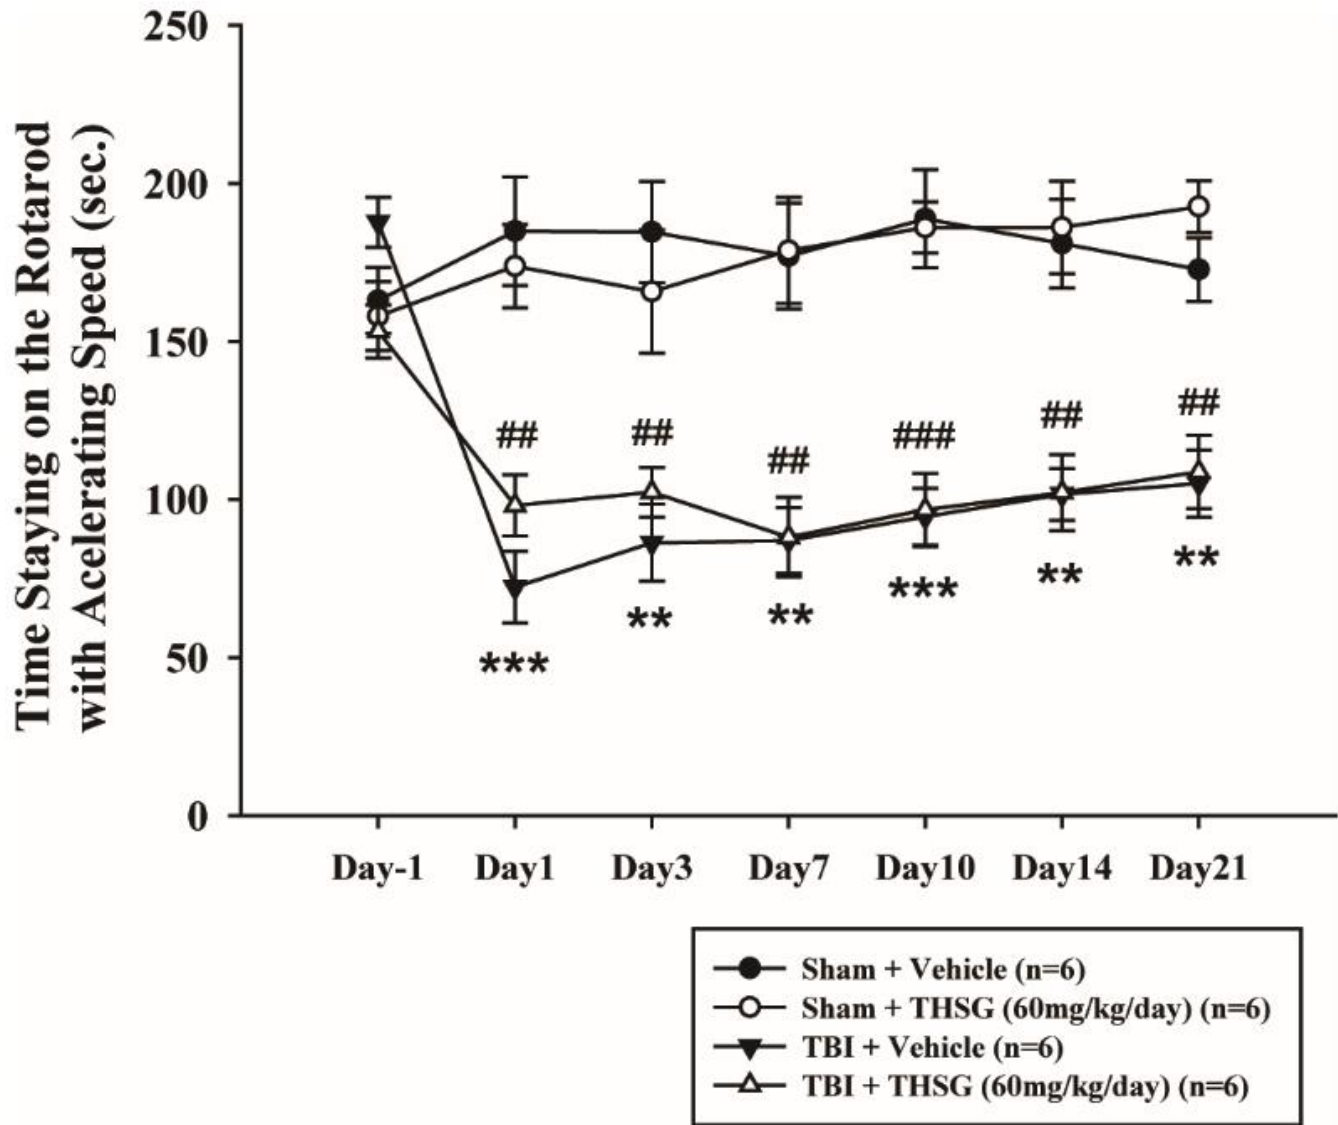

**Supplementary Figure 1. Effects of THSG on rotarod performance following post-TBI.** Evaluation of motor coordination by rotarod test in THSG treatments after TBI for 21 days. The time staying on rotarod with accelerating speed was measured. Data represent the mean ± SEM (n = 6 per group). \*\*, P < 0.01 TBI + Vehicle vs. Sham + Vehicle group; \*\*\*, P < 0.001 TBI + Vehicle vs. Sham + Vehicle group; ##, P < 0.01 TBI + THSG vs. Sham + Vehicle group; ###, P < 0.001 TBI + THSG vs. Sham + Vehicle group.
